# Supplementary material
Source: Springer Nature journal article supplement (https://www.springermedizin.de/resource/supplementary/12903_2014_479_MOESM2_ESM.pdf/9516754)

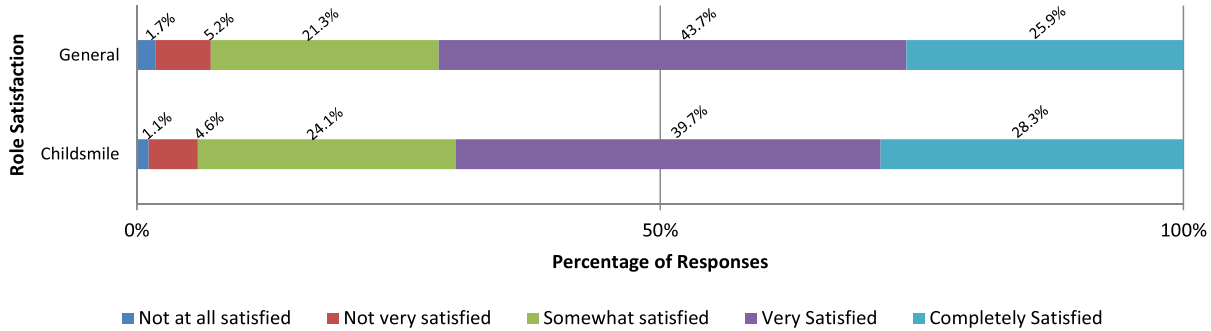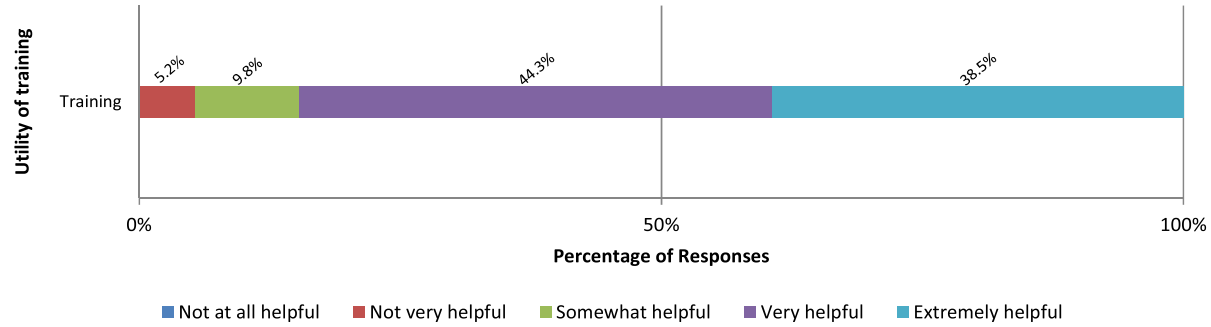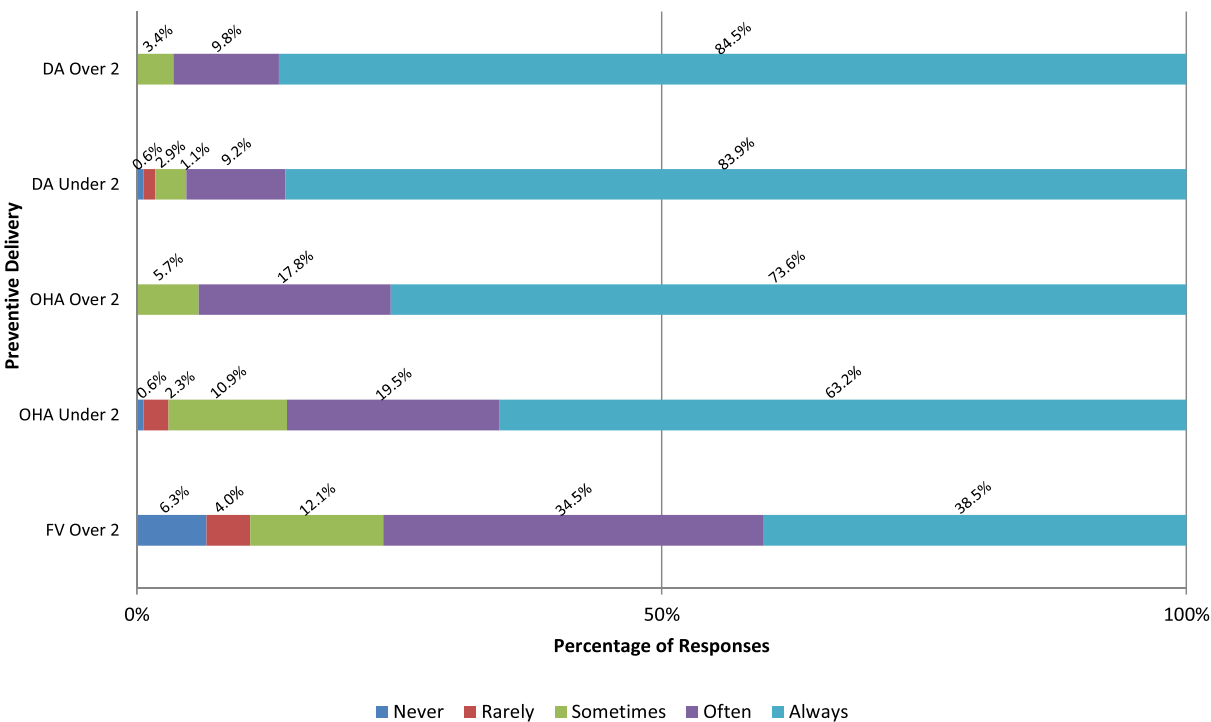

Supplement: MOESM2 [file 9516754]
